# Supplementary material for: Source, transport and fate of soil organic matter inferred from microbial biomarker lipids on the East Siberian Arctic Shelf
Source: Copernicus journal article supplement (doi:10.5194/bg-2016-128), 2016-04-15
Supplement: Supplementary file 1 [file Table S1.xlsx]

## Sheet: Table S1
Table S1. BHP structures and abbreviations refered to throughtout the text
Full Name	Abbreviation	APCI Base Peak ion m/z	Structure number	Structure
Adenosylhopane	G1	746+788+ 830a	1a
2Me-adenosylhopane	2Me-G1	760+802+ 844a	2a
Adenosylhopane Type 2	G2	761	1b
2 Me-adenosylhopane Type 2	2Me-G2	775	2b
Adenosylhopane Type 3	G3	802	1b’
2Me-adenosylhopane Type 3	2Me-G3	816	2b’
35-Aminobacteriohopane-30,31,32,33,34-pentol	Aminopentol	830	1c
35-Aminobacteriohopane-31,32,33,34-tetrol	Aminotetrol	772	1d
35-Aminobacteriohopane-32,33,34-triol	Aminotriol	714	1e
Bacteriohop-6-ene-32,33,34,35-tetrol	Δ6BHT	653	Δ6 1f
Bacteriohopane-32,33,34,35-tetrol	BHT	655	1f
Bacteriohopane-32,33,34,35-tetrol isomer	BHT isomer	655-II	1f’
2-Methylbacteriohopane-32,33,34,35-tetrol	2-Methyl BHT	669	2f
Bacteriohopane-30,31,32,33,34,35-hexol	BHHexol	771	1g
Bacteriohopane-32,33,34,35-tetrol cyclitol ether	BHT cyclitol ether	1002 +1044b	1h
Bacteriohopane-32,33,34,35-tetrol glucosamine	BHT glucosamine	1002	1i
