# Supplementary material for: Source, transport and fate of soil organic matter inferred from microbial biomarker lipids on the East Siberian Arctic Shelf
Source: Copernicus journal article supplement (doi:10.5194/bg-2016-128), 2016-04-15
Supplement: Supplementary file 2 [file Table S2.xlsx]

## Sheet: Table S2
	Sample	Latitude	Longitude	Distance from river mouth (km)	Bottom depth (m)	OC (%)a,b	d13C (‰)a	d15N (‰)a	BITc	D6 1f	1f	1f'	2f	1g	1e	1d	1c	1h	1i	1a	2a	1b	2b	1b'	2b'	total BHPs	total non-methyl soil BHPs	Rsoil	R'soil
	Buor-Khaya Bay
	TB-17	72.2907	132.921	117.808	21	1.5097	-25.55	3.316	0.411639	4.33111	117.051	11.1807	10.2815	2.28988	15.6215	4.27378	1.97557	6.73001	0.569776	62.7366	2.41661	28.1203	6.41952	7.95276	3.44837	285.399	98.8096	0.486945	0.457747
	TB-18	72.1667	133	106.999	16	0.8	-25.8	2.7	0.342804	3.00698	85.2453	10.052	7.54239	1.9627	10.5354	2.91072	1.50102	4.70341	1.24894	58.5744	2.19203	22.2568	5.23371	6.5684	2.24641	225.781	87.3996	0.532434	0.506239
	TB-19	72.0862	132.776	100.229	14	0.4655	-26.036	3.316	0.485768	4.20135	98.8515	14.1657	6.65444	1.206	18.1574	2.20637	0	2.51582	0.535885	56.7673	2.0462	25.7565	5.21061	6.3329	2.27948	246.887	88.8567	0.498838	0.473377
	TB-20	71.9263	132.615	95.6239	N/A	0.08	N/A	N/A	0.678752	9.26772	129.333	18.3933	11.3934	1.8686	11.9433	1.48053	0	0	0	36.8482	0	25.8757	0	4.2024	0	250.606	66.9263	0.34101	0.34101
	TB-22	71.8751	132.115	104.511	15	0.4	-25.3	1.5	0.441357	1.23563	29.3672	2.57199	2.95942	0	3.63345	0.794829	0	0	0	7.47526	0	4.59441	0	4.59441	0	57.2266	16.6641	0.362017	0.362017
	TB-23	71.8256	131.668	97.1831	20	1.5909	-25.772	3.316	0.489389	3.79803	95.5225	10.7376	9.39463	2.24965	13.5167	3.14147	1.88693	6.1627	0.913453	71.2281	2.35128	29.7495	6.60748	9.55248	4.02169	270.834	110.53	0.56389	0.536417
	TB-24	71.7637	131.166	85.0881	16	1.867	-25.623	3.316	0.529141	5.15303	119.443	12.2489	11.7058	2.24623	20.6267	3.42244	2.27539	8.51553	0.908695	76.3854	3.72781	33.2645	5.70683	10.1602	3.88113	319.672	119.81	0.527087	0.500767
	TB-25	71.7201	130.83	80.7062	13	1.8836	-25.791	3.316	0.545796	5.78417	104.633	6.02648	9.85402	1.97847	21.0694	3.65418	1.79564	7.63827	0.894208	73.6032	2.76128	29.35	6.49186	5.81795	2.1015	283.453	108.771	0.534466	0.509697
	TB-26	71.6862	130.579	77.7014	12.5	2.0895	-25.792	3.316	0.619906	1.25668	26.5482	2.67298	2.89073	0	9.41065	1.21224	0	2.09595	0.396465	36.6331	1.35963	15.8633	3.0603	3.7525	1.29395	108.447	56.2489	0.700058	0.679358
	TB-27	71.6583	130.325	75.2444	10.6	1.9	-26	2.3	0.646767	6.54817	121.452	14.2714	9.97072	4.63545	15.6931	3.89028	3.0485	15.7428	1.83505	68.7219	2.25322	27.3061	5.93722	4.46327	1.63315	307.403	100.491	0.475973	0.452778
	TB-28	71.6182	130.037	70.2511	5.3	2.1495	-26.163	3.316	0.781927	1.60782	44.6087	6.70475	4.18685	1.60329	6.20667	0.796299	0.90543	5.63424	0.544197	35.3932	1.07745	12.7129	1.7923	3.60129	1.15465	128.53	51.7074	0.555427	0.536851
	TB-30	71.8667	129.833	44.7677	5	2.0361	-26.029	3.316	0.875932	3.40054	74.7038	10.6473	6.92621	0.590164	9.3594	0.970618	0	9.84509	0.742175	60.3468	1.65649	21.1941	3.649	6.8889	2.24194	213.162	88.4298	0.562319	0.54207
	TB-31	71.8628	130.323	55.9597	12	2.2487	-25.915	3.316	0.635703	2.31635	45.8264	5.27197	5.28062	0.541439	11.8985	1.89026	1.22731	7.00998	0.844023	37.3259	1.40573	15.6966	3.06789	5.38532	2.02159	147.01	58.4078	0.58614	0.560351
	TB-32	71.8621	131.093	75.2444	12	1.9	-25.7	3	0.556579	5.78315	118.413	11.6817	10.7042	3.1738	30.7944	5.32893	3.61302	9.13866	1.56635	71.7325	3.04729	30.5138	6.25355	10.0911	3.96628	325.801	112.337	0.514737	0.486836
	TB-33	72.0919	131.088	65.0674	14.5	2.2	-25.8	3.4	0.528632	4.06172	90.4749	7.32774	7.72969	1.10758	31.6626	5.42711	1.74547	13.4504	1.60949	64.8505	2.72743	28.157	5.81418	7.46257	3.08861	276.697	100.47	0.553376	0.526173
	TB-34	72.2868	131.088	62.7148	16	1.9	-25.7	2.9	0.407005	3.46284	88.2338	10.1891	7.28483	1.80523	15.0983	3.38723	1.48529	6.8165	1.53385	66.4616	2.62964	26.7826	5.82152	6.55542	2.46662	250.014	99.7996	0.556505	0.530755
	TB-35	72.4574	131.092	60.2704	16.5	2.3	-26	2.6	0.542986	3.42525	111.565	9.67081	9.58409	0.93614	15.2452	2.34863	0.680873	5.97364	1.08452	58.4257	2.61249	24.6504	3.46571	7.11421	2.80935	259.592	90.1903	0.470359	0.447028
	TB-36	72.5884	131.095	58.37	17	2.1158	-25.878	2.497	0.394586	6.51402	197.26	24.3914	17.9301	4.44817	32.6529	6.03823	3.99004	31.5897	3.08591	125.485	4.23837	50.2547	9.48339	12.936	4.61372	534.911	188.675	0.51206	0.488878
	TB-37	72.7074	131.088	56.6272	18.5	2.3878	-25.98	2.589	0.597786	3.92235	60.8039	6.95532	5.54439	0.906585	8.4797	1.3066	0.892642	4.31177	0.497045	34.3513	1.12525	13.2144	2.2664	3.91678	1.49361	149.988	51.4824	0.48107	0.458493
	TB-38	72.9253	130.842	58.5842	20	2.3458	-25.966	3.054	0.494389	3.70243	84.8719	9.55844	6.02855	2.78667	15.1231	3.21299	3.07126	12.2833	1.0385	40.4112	1.26952	19.5564	4.46197	4.69796	1.84337	213.918	64.6656	0.459801	0.432437
	TB-39	72.9281	130.658	52.2557	20	2.2967	-25.902	2.939	0.53478	4.92324	148.615	14.1707	10.8164	5.09156	30.493	5.01092	6.19884	26.3096	1.22226	62.1035	1.90621	29.7284	4.73449	4.14967	1.73938	357.213	95.9816	0.412535	0.392408
	TB-40	72.927	130.03	35.0363	6	1.5027	-26.006	1.548	0.884921	4.85834	110.863	12.0379	11.3462	2.92707	17.2142	2.60882	2.43719	14.4615	0.689095	68.8092	2.94354	32.6666	5.72505	9.31064	3.83084	302.729	110.786	0.526528	0.499828
	TB-43	72.8915	131.931	90.2323	21.8	1.5581	-25.616	2.739	0.404166	5.70568	125.213	13.6619	9.9572	2.72586	15.1596	3.13029	1.56757	7.61331	1.22969	42.1007	1.92978	24.8481	5.38659	4.22208	1.76485	266.216	71.1709	0.390589	0.362408
	TB-44	72.7058	131.663	74.4074	18.8	2.0935	-25.897	3.011	0.441437	4.17357	90.527	4.89259	7.98423	1.96632	10.6939	1.46075	1.34804	8.31718	0.864134	56.4617	2.59068	23.7211	3.75117	8.66574	3.64365	231.062	88.8485	0.521934	0.495321
	TB-45	72.7001	130.656	42.4704	15	2.2372	-25.904	2.597	0.595687	2.68077	65.2483	6.37742	5.96538	1.45155	8.37708	1.88208	1.16346	10.2881	1.33813	42.3257	1.78667	16.4381	2.87034	5.60348	1.82087	175.617	64.3673	0.520563	0.496602
	TB-46	72.7009	130.175	28.3136	6	2.5797	-26.463	1.367	0.921084	2.56128	53.3869	6.13513	5.75812	0.543911	11.0336	1.8167	0	5.57779	0	45.8211	1.98237	17.7554	3.96063	5.13519	1.44067	162.909	68.7117	0.58769	0.562756
	TB-47	72.4503	130.125	25.0259	N/A	2.78	N/A	N/A	0.947211	5.32025	76.5518	5.74841	8.63233	0	29.8373	0	1.92586	30.7021	1.17847	89.4937	2.83571	31.5383	4.32123	7.58341	2.74633	298.415	128.615	0.644062	0.626881
	TB-48	72.5881	130.123	26.9537	6.5	3.8126	-26.611	2.193	0.94586	3.96076	111.173	16.575	10.1099	2.37878	23.2337	4.46559	4.69399	32.3431	0	91.9441	2.88522	29.4274	5.36031	8.85757	2.80811	350.216	130.229	0.559634	0.53947
	TB-49	72.5878	130.679	44.7677	14	2.0203	-25.784	2.511	0.667199	7.21499	143.955	14.3524	14.0695	3.54269	31.036	5.20662	4.75337	24.1183	1.56953	85.4735	3.17501	33.0136	6.54858	11.7206	4.19449	393.944	130.208	0.500296	0.474928
	TB-50	72.5867	131.661	76.4008	18	1.8157	-25.733	2.485	0.431192	5.68199	135.459	16.8575	11.7395	1.44249	19.1941	3.19435	0.869274	8.97212	0.936692	77.9155	4.03592	32.2934	4.65103	11.6909	4.76738	339.701	121.9	0.499806	0.473657
	TB-52	72.4545	130.668	46.1455	18	1.3372	-25.77	3.071	0.646183	6.382	103.075	12.3261	10.347	1.01	23.6918	5.99798	1.36067	11.5966	1.33431	68.2896	1.99647	28.3556	5.92659	6.73204	2.94353	291.365	103.377	0.525698	0.500733
	TB-54	72.2835	130.593	42.4704	10	0.876	-25.668	1.597	0.505858	10.3735	222.406	26.7771	18.2775	9.00182	45.1558	8.67729	9.48998	49.1691	3.6627	99.7276	2.88011	46.3254	7.96575	13.5179	5.11817	578.525	159.571	0.441108	0.41775
	TB-55	72.2854	131.717	83.3029	17	1.9711	-25.751	3.12	0.504563	4.71253	99.5822	10.434	7.99501	0.981354	13.9437	2.82232	0.637855	6.27713	1.12601	64.9621	2.29036	27.0916	5.43792	9.65079	4.2279	262.173	101.705	0.533011	0.505272
	TB-56	72.0986	131.718	85.0881	15	1.8032	-25.738	3.118	0.487785	2.83559	66.8078	7.16559	4.65325	2.26101	16.2028	3.13839	2.93243	8.98954	0.746828	42.6733	1.59428	17.6991	3.64609	5.92476	2.51399	189.785	66.2971	0.525712	0.498081
	TB-57	72	131.772	92.0192	10	1.8318	-25.702	3.553	0.440534	4.5295	87.0184	7.47592	7.77203	2.08241	28.4531	5.19335	3.01289	8.65708	1.07963	46.7041	1.44832	21.3053	4.52185	5.90081	2.38188	237.537	73.9102	0.485952	0.459273
	TB-59	72.0916	130.063	30.4453	11	1.8696	-25.982	2.136	0.784784	5.27796	108.405	5.92254	6.9904	0.906423	12.9861	2.35793	1.02465	11.0291	0.8681	48.609	1.40382	22.5798	3.88265	6.58887	2.49469	241.327	77.7777	0.441108	0.41775
	YS-9	73.366	129.997	55.2841	23	1.35	N/A	N/A	0.418508	8.7614	162.674	17.882	11.7997	1.4256	27.9402	4.66737	0	11.7705	2.30759	119.603	5.31082	47.0769	7.42892	15.6537	7.04038	451.342	182.334	0.554059	0.528492
	YS-10	73.184	129.996	40.3531	20	1.48	N/A	N/A	0.479782	4.42956	102.703	11.2154	9.4753	3.56799	23.1561	3.85063	4.50657	24.8405	1.2574	57.4897	2.14166	22.0826	4.1587	3.95152	1.51668	280.343	83.5239	0.470724	0.448507
	YS-11	73.019	129.989	32.0488	11	1.97	N/A	N/A	0.701305	3.36788	56.0935	6.03322	6.5377	0.822619	11.1805	1.72491	0.82503	4.13768	0.470408	26.6966	1.01331	15.0363	2.75379	2.65197	0.984014	140.33	44.3849	0.466941	0.441735
	YS-12B	71.922	132.391	101.224	10	0.129	N/A	N/A	0.529563	39.419	312.951	90.6463	57.6902	0	52.9962	9.53249	6.08668	15.9222	0	136.588	0	69.1765	15.7142	12.2702	5.4641	824.457	218.035	0.433228	0.410622
	YS-13	71.968	131.701	90.2323	19	1.89	-25.9	N/A	0.475654	4.9512	112.003	10.8523	8.47136	1.73855	31.6597	5.13293	3.19157	18.7863	1.59735	77.1984	2.57743	32.9993	6.94085	8.30021	3.12552	329.526	118.498	0.539357	0.514089
	YS-14	71.63	130.05	70.0726	7	1.91	-26.2	N/A	0.8772	10.2924	165.908	19.4451	19.0375	5.12588	23.5555	2.99352	3.68511	35.4725	1.69299	96.0611	4.09878	48.3324	9.56028	12.4682	4.47111	462.201	156.862	0.513323	0.485986
	YS-15	71.628	130.054	70.0726	11	2.6	N/A	N/A	0.75772	4.69087	132.254	12.226	10.946	3.97685	21.5424	3.5155	4.04658	31.1342	1.55507	72.3452	2.33116	38.0477	5.70455	11.4375	3.51611	359.27	121.83	0.502123	0.479488
	YS-16	71.627	130.318	75.2444	11	2.08	N/A	N/A	0.638674	7.86085	146.802	13.5241	13.4621	2.66374	22.321	3.3236	3.22841	31.2037	2.32168	97.8677	4.34555	39.6263	8.35873	11.4854	4.42632	412.821	148.979	0.530853	0.503681
	YS-17	71.63	130.191	75.0778	10	1.35	N/A	N/A	0.661061	1.21627	30.7144	3.23268	2.86167	0	8.53442	0.544809	0	4.05903	0.476235	86.096	3.01619	29.9853	5.89207	10.0424	3.59632	190.268	126.124	0.818626	0.804165
	YS-18	73.031	133.002	127.902	15	0.17	N/A	N/A	0.260692	1.9687	64.0738	5.74889	3.86855	0	7.55957	0	0	0	0	30.8292	0	19.1962	3.70313	4.57143	2.17689	143.696	54.5968	0.48556	0.46007
	YS-19	73.035	133.456	141.656	27	1.82	-25.8	N/A	0.351006	2.36586	86.6108	9.12722	5.56216	0.881736	8.1852	1.48425	0	3.94132	0.533183	37.8913	1.52914	18.1575	3.31309	5.90556	0	185.488	61.9543	0.435419	0.417018
	ESAS Offshore
	YS-4	75.987	129.984	293.306	50	1.34	-24.3	N/A	0.0702213	3.49536	76.6575	6.02321	5.87205	0	6.72473	0.944793	0	0	0	10.7154	0	6.44948	1.43153	1.5878	0.837161	120.739	18.7527	0.215209	0.196548
	YS-5	75.266	130.017	212.116	43	1.48	N/A	N/A	0.0888257	2.50588	76.2466	5.78919	4.39679	0.580974	8.93048	0.86224	0	2.36011	0.624244	19.2503	0.935774	10.9556	2.066	4.02973	1.61259	141.146	34.2356	0.337543	0.309875
	YS-6	74.724	130.016	158.04	32	1.86	-25.6	N/A	0.147286	2.85417	73.5195	6.09094	4.64603	0.890059	16.7686	2.76372	0.905587	7.72695	0.768361	31.291	1.42306	15.4068	3.68809	5.57065	2.25336	176.567	52.2685	0.447855	0.415528
	YS-28	72.651	154.185	172.878	28	0.87	-26.2	6.43	0.149301	2.73008	67.5858	8.76347	3.61206	0	5.49336	0.447739	0	0	0	17.6748	0	8.42329	1.39192	2.40337	0	118.526	28.5015	0.306664	0.296621
	YS-31	71.592	161.694	229.202	20	0.56	-26.5	6.81	0.282336	3.07185	98.6532	9.94032	4.38589	0	7.67244	1.30437	1.28168	0	0	38.3581	0	18.4922	2.39595	5.6364	2.61825	193.811	62.4867	0.406255	0.387779
	YS-36	69.817	165.999	160.478	32	0.8	-26	6.69	0.121945	2.36315	72.5295	9.36926	3.84314	1.11852	6.3001	0.655925	0.719049	2.37847	0.678609	22.5388	1.2595	17.8134	3.42907	3.19831	1.3317	149.527	43.5505	0.405984	0.375177
	YS-37	70.135	168.007	245.305	42	0.94	-25.7	7.91	0.0655816	5.42628	136.193	12.4497	6.07584	2.18943	9.96201	0.837549	0.416393	3.8913	1.04155	33.4929	1.52568	20.1597	4.03826	4.19045	1.85321	243.743	57.843	0.323947	0.298104
	YS-38	70.698	169.132	306.258	36	1	-25.3	8.17	0.0521828	4.26803	105.663	9.46823	4.0718	0.996922	10.03	0.850643	0.808158	3.02009	1.10525	12.515	0.827497	8.47838	1.45888	0.894852	0	164.457	21.8882	0.186192	0.171604
	YS-39	71.219	169.373	340.389	44	1.23	-24.3	8.8	0.0178305	4.01963	117.458	10.4153	4.22335	0	6.34365	0.291466	0	2.42839	0.906821	10.03	0	5.51441	1.02605	1.99121	1.22101	165.869	17.5356	0.144146	0.129899
	YS-40	71.483	170.553	391.334	49	1.36	-23.9	9.34	0.0168712	3.16993	113.148	13.4899	4.78252	0	5.59676	0	0	2.13519	1.12383	6.09449	0	3.41477	0	0.774151	0	153.73	10.2834	0.0833125	0.0833125
	YS-41	71.968	171.792	459.415	43	1.32	-23.9	9.34	0.0251249	2.6942	97.4815	10.5386	2.43118	0	11.1667	0.914979	0	4.9467	0.780758	4.09236	0	2.29273	0	0.495397	0	137.835	6.88048	0.065929	0.065929
	YS-86	75.3013	174.396	775.093	200	0.89	-21.2	10.13	0.0102733	0.516604	8.96019	0.792541	1.24039	0	0.345819	0	0	0	0	0	0	0	0	0	0	11.8555	0	0	0
	YS-88	75.0993	172.187	719.512	142	1.04	-21.5	10.21	0.0136474	0	29.6018	3.17392	5.46291	0	1.00233	0	0	0	0	0	0	0	0	0	0	39.2409	0	0	0
	YS-90	74.6682	172.388	683.075	63	0.85	-22.4	9.38	0.0201277	2.04981	57.5952	5.8263	3.99314	0	2.10656	0	0	0	0	0	0	0	0	0	0	71.571	0	0	0
	YS-91	74.4337	170.855	637.685	56	0.82	-23.3	9.55	0.0214194	3.95912	125.834	11.5119	6.63865	0	7.81441	1.42262	0	1.64398	0.475328	0	0	0	0	0	0	159.301	0	0	0
	YS-93	74.4185	165.999	571.775	51	0.8	-23.8	9.65	0.0329273	2.47997	85.1543	8.9784	7.27026	0	38.2461	13.4364	0	0	0	0	0	0	0	0	0	155.565	0	0	0
	YS-95	74.4167	161.335	479.793	45	0.97	-24.8	8.9	0.0385439	3.15503	85.8443	10.8304	5.60707	0	12.8608	2.05381	0	1.86861	0.22695	6.07977	0	2.14152	0	0.650099	0	131.318	8.87139	0.0936633	0.0936633
	YS-98	75.551	160.751	555.282	48	0.77	-23.9	8.5	0.0323697	4.59721	60.478	7.7553	5.11559	0	3.77554	0	0	0	0	2.74125	0	0.783961	0	0	0	85.2469	3.52521	0.0550787	0.0550787
	YS-99	75.171	163.586	585.607	50	0.77	-23.4	8.83	0.0552335	1.75959	33.2224	3.17885	3.4961	0	3.0548	0	0	0	0	0	0	0	0	0	0	44.7117	0	0	0
	YS-100	75.7157	164.079	635.718	58	0.76	-22.4	8.96	0.0277434	1.30586	20.0249	1.99303	2.8456	0	2.39043	0	0	0	0	0	0	0	0	0	0	28.5598	0	0	0
	YS-102	76.5592	160.072	633.685	69	0.77	-22.3	8.87	1e-05	0	28.7657	1.96762	3.85976	0	6.24957	1.18966	0	0	0	0	0	0	0	0	0	42.0323	0	0	0
	YS-104	76.9338	155.169	616.837	57	0.91	-23.1	8.98	0.0521706	1.9614	50.7279	5.16329	3.24431	0	7.34038	2.06725	0	0	0	3.01591	0	1.49579	0	0.485234	0	75.5015	4.99693	0.0896715	0.0896715
	YS-106	76.9685	150.291	600.956	43	0.87	-23.8	7.9	0.0489719	4.06535	84.1735	9.0071	5.48339	0	4.43501	0	0	0	0	4.3395	0	1.97082	0	0.674986	0	114.15	6.98531	0.0766279	0.0766279
	YS-111	74.9973	160.01	497.103	46	0.8	-24.2	7.78	0.0551834	2.52026	87.3133	11.8341	6.87349	0	13.1508	4.65515	0	0	0	6.20772	0	1.90825	0	1.12699	0	135.59	9.24296	0.0957262	0.0957262
	YS-112	74.8327	159.33	470.194	42	0.88	-24.6	7.95	0.0731178	3.43621	97.2507	9.57672	5.42548	0	0	0	0	0	0	10.4606	0	4.9803	0.95621	1.72073	0	133.807	17.1616	0.157043	0.149998
	YS-116	74.5828	157.003	403.531	36	0.6	-25.5	7	0.0712794	2.18061	49.8947	5.49081	0	0	5.98034	2.08658	0	0	0	8.45416	0	4.86885	0	1.44145	0	80.3975	14.7645	0.228343	0.228343
	YS-118	74.3342	156.008	361.38	28	0.71	-25.2	6.39	0.0863499	2.91235	72.2717	12.099	2.53908	0	5.7918	0	0	0	0	23.6643	0	8.81777	1.37196	3.99868	1.96916	135.436	36.4807	0.355255	0.335447
	YS-120	73.2918	155.167	250.859	33	0.99	-25	7.62	0.0873291	2.68694	67.798	9.14408	6.27335	0	13.7843	1.49969	0.555008	0	0	12.299	0	5.88904	1.18374	1.27661	0.675207	123.065	19.4647	0.239264	0.223058
	YS-131	76.3982	125.473	336.689	50	0.4	-24.3	6.31	0.049097	4.14362	163.469	25.896	6.61729	0	30.1419	5.09986	0	0	0	5.55215	0	6.42001	0	0	0	247.34	11.9722	0.0682402	0.0682402
	ESAS Nearshore
	YS-8	73.566	130.008	68.0779	14	0.18	N/A	N/A	0.0967457	6.36179	161.033	12.1661	7.42689	0	16.5496	2.77175	0	0	0	42.4066	0	29.0652	8.01473	5.44463	0	291.24	76.9165	0.345299	0.323247
	YS-26	72.46	150.596	96.1465	1	0.87	-27.4	5.27	0.465837	1.13671	48.0177	4.49987	3.36132	0	7.3213	1.18721	0	0	0	36.0063	0	10.5484	1.52283	4.19194	1.23083	119.024	50.7466	0.527003	0.513815
	YS-27	72.567	152.373	127.608	18	0.41	-26.2	6.03	0.281669	1.48031	42.1035	4.43701	2.29846	0	2.75831	0	0	0	0	13.5783	0	5.75408	1.47732	2.14279	0	76.03	21.4751	0.352811	0.337773
	YS-29	72.2	153.166	110.794	18	0.63	-26.6	5.68	0.321836	0	30.4388	1.79073	1.71994	0	3.40462	0	0	0	0	2.06815	0	6.4433	1.23339	2.5302	0.732519	50.3616	11.0417	0.299394	0.26619
	YS-30	71.358	152.153	42.4704	9	1.35	-27.4	5.03	0.580018	1.47905	47.8358	3.9202	3.47742	0.604583	5.94475	0.803512	0	2.53972	0.294882	27.9783	1.22646	11.5959	2.02653	3.8965	1.23573	114.859	43.4707	0.500645	0.476096
	YS-32	70.567	161.217	111.133	9	0.42	-26.4	6.66	0.3345	3.51526	120.146	17.9362	6.11392	2.17611	6.84731	0	0	0	0	35.8758	0	16.4963	4.12454	3.65904	0	216.89	56.0311	0.33364	0.318039
	YS-33	70.168	161.217	67.3379	8	0.4	-26.2	6.35	0.29953	4.7724	111.142	12.5916	6.18113	0	8.90936	0	0	0	0	54.8476	0	29.3596	6.37277	8.71949	3.96845	246.864	92.9267	0.481638	0.45537
	YS-34B	69.71	162.69	31.6556	10	1.12	-27.3	4.24	0.510661	3.15595	64.3286	10.0599	4.2835	1.88437	11.0998	1.85949	2.86664	15.1183	1.30697	56.014	1.42726	23.0525	4.03117	5.83295	2.28474	208.606	84.8994	0.590188	0.568924
	YS-35	69.817	164.057	85.675	31	1.22	-26.8	5.9	0.279809	4.76348	104.035	10.6225	7.15092	2.41188	28.9866	5.27497	5.73804	16.7471	1.47945	53.435	0	27.6466	4.52902	5.80408	2.37309	280.997	86.8857	0.4741	0.455088
	Dmitry-Laptev Strait
	YS-20	73.305	139.893	232.674	8	0.39	-26.9	4.63	0.500094	3.06219	71.5363	9.40553	3.90208	0	8.29018	0	0	0	0	51.7576	0	16.4401	3.45246	6.78395	2.08535	176.716	74.9817	0.529539	0.511758
	YS-21	73.089	140.348	220.966	15	0.81	-27	4.69	0.462022	1.27522	29.8066	3.93343	2.52141	0	2.60453	0.3058	0	1.48813	0.576466	23.6921	0	6.04057	1.24404	3.31946	1.24252	78.0503	33.0521	0.54386	0.525816
	YS-22	72.875	140.629	206.733	20	1.18	-27.4	4.5	0.660295	1.90391	53.7492	3.20213	5.1864	0.905895	6.4478	0.642049	0	3.93837	0.848483	49.8803	1.67222	16.2117	2.76095	4.38604	1.7287	153.464	70.478	0.587779	0.567332
	YS-22B	72.886	140.619	211.702	15	1.07	-27.4	4.83	0.586672	5.07395	157.429	24.7347	10.4596	2.45526	19.5666	2.13746	3.72717	17.712	3.60911	140.463	0	42.3551	6.36495	12.5929	4.58468	453.265	195.411	0.567253	0.553824
	YS-23	72.789	142.67	256.488	10	0.91	-27.2	5.11	0.537003	2.24603	70.5568	6.02592	4.68012	0.700349	7.24379	0.73436	0	3.14391	0.83848	47.8773	1.93851	14.3661	2.53624	6.01529	2.70169	171.605	68.2586	0.516707	0.491722
	YS-24	73.048	142.667	270.326	15	0.77	-27.4	4.97	0.561246	2.63425	84.1683	9.65436	5.57687	0.969108	8.56154	0	0	4.29545	1.07828	57.1575	0	17.5198	3.35106	6.45586	2.55588	203.978	81.1331	0.508387	0.490819
	YS-25	73.143	142.667	280.335	10	1.02	-27.3	4.83	0.532972	0	123.783	19.4062	7.18961	1.90177	13.8585	3.3309	3.01176	11.2875	1.51643	78.7985	2.32797	25.2185	5.27983	10.7138	5.25988	312.884	114.731	0.50759	0.481025
	a Data taken from Vonk et al. (2012)
	b OC = Organic Carbon
	c BIT = Branched and Isoprenoid Tetraether index (data from Sparkes et al., 2015)
