# Supplementary material for: Source, transport and fate of soil organic matter inferred from microbial biomarker lipids on the East Siberian Arctic Shelf
Source: Copernicus journal article supplement (doi:10.5194/bg-2016-128), 2016-04-15
Supplement: Supplementary file 3 [file Table S3.xlsx]

## Sheet: Table S3
Table S2. Sample details, bulk parameters and BHP concentrations (ug/gTOC) in Ice complex/Permafrost samples
Sample	Details/Location	Depth (m)	Lattidude	Longitude	OC (%)	d13C ‰	1f	1a	2a	1b	2b	1b’	2b’	Total NM-soil	R'soil
Lena River Region
CB	Cape Bykovsky	1.9	71°47' N	129°25'E	3.81	-25.99	94	120	BDL	66	BDL	17	BDL	203	0.683502
KUR 9	Kurungnakh Islanda	0.34	72°20' N	126°17'E	3.1	N/A	511.455	256.234	BDL	106.222	24.1732	12.0553	9.7571	374.512	0.422715
KUR 10	Kurungnakh Island	0.44	72°20' N	126°17'E	16.6	N/A	209.389	98.0231	BDL	69.974	21.2797	BDL	7.41492	167.997	0.44516
KUR 12	Kurungnakh Island	1.225	72°20' N	126°17'E	11.7	N/A	304.738	132.075	BDL	84.2172	BDL	BDL	19.4586	216.292	0.415124
KUR 14	Kurungnakh Island	2.25	72°20' N	126°17'E	14.5	N/A	126.71	85.0495	BDL	22.0197	BDL	BDL	2.48601	107.069	0.457993
KUR 15	Kurungnakh Island	3.235	72°20' N	126°17'E	1.4	N/A	361.995	91.4001	BDL	104.993	BDL	17.411	BDL	213.804	0.371317
KUR 17	Kurungnakh Island	3.5	72°20' N	126°17'E	1.7	N/A	162.41	38.0651	BDL	64.3074	BDL	11.8999	BDL	114.272	0.41301
KUR 18	Kurungnakh Island	3.77	72°20' N	126°17'E	1.9	N/A	109.239	88.8982	BDL	51.7097	2.60795	12.9549	4.3071	153.563	0.58433
KUR 19	Kurungnakh Island	4.04	72°20' N	126°17'E	2	N/A	323.44	178.952	BDL	85.8451	9.77556	30.7812	11.5087	295.578	0.477496
KUR 20	Kurungnakh Island	4.775	72°20' N	126°17'E	2.4	N/A	189.899	100.588	BDL	65.465	BDL	19.1358	BDL	185.189	0.493722
KUR 21	Kurungnakh Island	6.27	72°20' N	126°17'E	1.5	N/A	323.013	202.13	BDL	306.682	27.6935	33.1824	10.7161	541.994	0.626578
KUR 22	Kurungnakh Island	7.805	72°20' N	126°17'E	1.9	N/A	231.72	126.822	BDL	100.268	8.68542	21.2385	BDL	248.329	0.517299
KUR 23	Kurungnakh Island	9.805	72°20' N	126°17'E	2.1	N/A	367.239	249.357	BDL	241.131	25.1005	49.9233	BDL	540.411	0.595396
KUR 24	Kurungnakh Island	11.84	72°20' N	126°17'E	5.6	N/A	225.025	178.984	BDL	153.062	12.6561	32.3966	6.80429	364.443	0.618257
KUR 25	Kurungnakh Island	14.405	72°20' N	126°17'E	2.4	N/A	532.76	213.468	BDL	124.512	13.6285	42.4422	BDL	380.422	0.41659
KUR 26	Kurungnakh Island	15.955	72°20' N	126°17'E	2.2	N/A	643.166	303.483	BDL	118.986	BDL	42.0838	BDL	464.553	0.419378
KUR 35	Kurungnakh Island	18.205	72°20' N	126°17'E	4.4	N/A	104.078	40.6942	BDL	18.5898	2.69891	6.47053	3.1067	65.7545	0.387174
KUR 27	Kurungnakh Island	19.275	72°20' N	126°17'E	3.3	N/A	145.319	147.451	BDL	102.546	8.71041	13.4458	BDL	263.443	0.644491
KUR 28	Kurungnakh Island	19.855	72°20' N	126°17'E	5	N/A	194.082	119.045	BDL	78.9126	5.61128	21.8369	8.58227	219.794	0.531062
KUR 29	Kurungnakh Island	21.32	72°20' N	126°17'E	0.7	N/A	342.423	260.102	BDL	192.461	15.9885	34.6319	BDL	487.195	0.587252
KUR 30	Kurungnakh Island	21.96	72°20' N	126°17'E	4.3	N/A	222.033	100.182	BDL	143.098	51.2902	19.4262	6.47952	262.706	0.541954
KUR 31	Kurungnakh Island	22.43	72°20' N	126°17'E	0.2	N/A	38.2301	31.2384	BDL	15.3575	6.35007	2.75205	BDL	49.348	0.563474
KUR 36	Kurungnakh Island	24.275	72°20' N	126°17'E	0.6	N/A	25.592	15.7112	BDL	4.61586	1.07513	2.10167	2.23646	22.4287	0.467064
KUR 33	Kurungnakh Island	24.55	72°20' N	126°17'E	0.1	N/A	6.91563	3.35248	BDL	4.68834	1.35202	1.43705	1.74733	9.47787	0.578148
Indigirka Region
KYEX3b	Indigirka	Shallow	70.83 N	147.49 E	1.553	N/A	28	38	2.5	15	2.1	7	BDL	60	0.681818
KYEX3b	Indigirka	Middle	70.83 N	147.49 E	1.497	N/A	19	38	3.3	24	3	5.4	BDL	67.4	0.780093
KYEX3b	Indigirka	Deep	70.83 N	147.49 E	1.625	N/A	20	41	4.3	27	3	9.8	1.6	77.8	0.795501
Kolyma River Region
CR IC 5.4	Chukochya Riverc	5.35-5.45	69°29'27'' N	156°59'42''E	1.45	-23.02	22	53	BDL	15	BDL	13	BDL	81	0.786408
CR IC 7.6	Chukochya Riverc	7.5-7.6	69°29'27'' N	156°59'42''E	1.55	-24.97	30	77	BDL	33	BDL	13	BDL	123	0.803922
CR IC 9.3	Chukochya Riverc	9.2-9.4	69°29'27'' N	156°59'42''E	0.93	-25.78	26	32	BDL	11	BDL	BDL	BDL	43	0.623188
OR IC 5.8	Omolon Riverd	5.70-5.80	68°43' N	158°54'E	0.94	-23.78	12	39	BDL	12	BDL	9.3	BDL	60.3	0.834025
OR IC 25.5	Omolon Riverd	25.45-25.50	68°43' N	158°54'E	1.63	-23.99	8.5	15	BDL	7.6	1.3	BDL	BDL	22.6	0.726688
CHYED-2b	Cherskii	Shallow	69.46 N	161.79 E	1.335	N/A	62	97	9.1	34	6.8	14	3.6	145	0.700483
CHYED-2b	Cherskii	Middle	69.46 N	161.79 E	1.604	N/A	29	52	3.4	20	3.9	9.7	2.3	81.7	0.738031
CHYED-2b	Cherskii	Deep	69.46 N	161.79 E	2.115	N/A	50	170	6	69	10	16	4.2	255	0.836066
a Further details of Kurungnakh Island core can be found in Bischoff et al. (2013). Global Biogeochemical Cycles 27, 305-317.
b Further details of KYEX3 and CHYED 2 samples can be found in Tesi et al. (2014). Geochimica et Cosmochimica Acta 133, 235–256.
c Chukochya River flows into Kolyma Gulf
d Omolon River - tributary of Kolyma River
